# Supplementary material
Source: publisher figshare collection journal article supplement (https://acs.figshare.com/ndownloader/files/4638640)
Supplement: Supplementary file 1 [file 4638640]

*Supporting Information*

# Synthesis and Structures of Platinum(0) Alkyne Complexes with Extended $\pi$ -Conjugated Systems

Kyohei Hayashi,<sup>†</sup> Mitsuharu Nakatani,<sup>†</sup> Akito Hayashi,<sup>†</sup> Masato Takano,<sup>†</sup> Masaaki Okazaki,<sup>†</sup> Kozo  
Toyota,<sup>‡</sup> Masaaki Yoshifuji,<sup>‡,§</sup> and Fumiyuki Ozawa<sup>\*,†</sup>

*International Research Center for Elements Science (IRCELS), Institute for Chemical Research, Kyoto  
University, Uji, Kyoto 611-001, Japan, and Department of Chemistry, Graduate School of Science,  
Tohoku University, Aoba-ku, Sendai 980-8578, Japan*

## Contents

|                                        |       |   |
|----------------------------------------|-------|---|
| Experimental Section                   | ----- | 2 |
| Table S2. Crystallographic Data for 1c | ----- | 4 |

## Experimental Section

All manipulations were carried out under a dry nitrogen atmosphere using standard Schlenk techniques. NMR spectra were recorded on a Varian Mercury 300 spectrometer. Chemical shifts are reported in  $\delta$ , referenced to  $^1\text{H}$  (of residual protons) and  $^{13}\text{C}$  signals of deuterated solvents as internal standards or to the  $^{31}\text{P}$  signal of 85%  $\text{H}_3\text{PO}_4$  as an external standard. Cyclic voltammetry was performed with a BAS ALS600C Electrochemical Analyzer. UV-vis absorption spectra were measured by a JASCO V560 spectrometer. Elemental analysis was performed by the ICR Analytical Laboratory, Kyoto University. DPCB-phen was prepared by a slightly modified literature method.<sup>1</sup>

**[Pt(dmad)(DPCB-phen)] (1a):** mp 273 °C.  $^1\text{H}$  NMR ( $\text{CDCl}_3$ , 20 °C):  $\delta$  1.50 (s, 18H), 1.66 (s, 36H), 3.74 (s, 6H), 5.30 (d,  $J_{\text{HH}} = 7.7$  Hz, 2H), 7.12 (t,  $J_{\text{HH}} = 7.7$  Hz, 4H), 7.48 (t,  $J_{\text{HH}} = 7.7$  Hz, 2H), 7.62 (s, 4H), 8.44 (d,  $J_{\text{HH}} = 8.4$  Hz, 2H).  $^{13}\text{C}\{^1\text{H}\}$  NMR ( $\text{CDCl}_3$ , 20 °C):  $\delta$  31.6 (s), 34.0 (s), 35.4 (s), 38.7 (s), 52.1 (s), 121.5 (t,  $J_{\text{PC}} = 432$  Hz,  $J_{\text{PC}} = 45$  Hz,  $\text{C}\equiv\text{C}$ ), 122.1 (s), 123.7 (s), 124.5 (s), 125.0 (s), 127.6 (s), 127.8 (s), 129.0 (t,  $J_{\text{PC}} = 4$  Hz), 132.2 (s), 142.9 (t,  $J_{\text{PC}} = 8$  Hz), 152.7 (s), 157.8 (s), 162.7 (t,  $J_{\text{PC}} = 19$  Hz), 172.8 (t,  $J_{\text{PC}} = 37$  Hz).  $^{31}\text{P}\{^1\text{H}\}$  NMR ( $\text{CDCl}_3$ , 20 °C):  $\delta$  150.7 (s,  $J_{\text{PP}} = 3913$  Hz). IR (KBr): 2963, 1771, 1704, 1206, 754  $\text{cm}^{-1}$ . FABMS:  $m/z$  1090 ( $\text{M}^+$ , 100), 945 (78). Anal. Calcd. for  $\text{C}_{58}\text{H}_{72}\text{O}_4\text{P}_2\text{Pt}$ : C, 63.90; H, 6.66. Found: C, 63.58; H, 6.84.

**[Pt(tolan-H)(DPCB-phen)] (1b):** mp >290 °C.  $^1\text{H}$  NMR ( $\text{CDCl}_3$ , 20 °C):  $\delta$  1.54 (s, 18H), 1.66 (s, 36H), 6.02 (d,  $J_{\text{HH}} = 8.1$  Hz, 2H), 7.10–7.16 (m, 2H), 7.10–7.16 (m, 2H), 7.22 (t,  $J_{\text{HH}} = 7.3$  Hz, 4H), 7.46 (t,  $J_{\text{HH}} = 8.1$  Hz, 2H), 7.67 (s, 4H), 7.82 (d, 4H), 8.44 (d,  $J_{\text{HH}} = 8.4$  Hz, 2H).  $^{13}\text{C}\{^1\text{H}\}$  NMR ( $\text{CDCl}_3$ , 20 °C):  $\delta$  31.6 (s), 33.8 (s), 35.4 (s), 38.9 (s), 122.3 (m,  $\text{C}\equiv\text{C}$ ), 122.3 (s), 123.7 (s), 124.9 (s), 125.1 (s), 126.7 (s), 127.1 (s), 127.4 (s), 127.9 (s), 130.8 (t,  $J_{\text{PC}} = 10$  Hz), 131.3 (s), 131.7 (t,  $J_{\text{PC}} = 48$  Hz,  $J_{\text{PC}} = 4$  Hz), 131.8 (s), 143.0 (t,  $J_{\text{PC}} = 6$  Hz), 152.2 (s), 157.0 (s), 173.0 (dd,  $J_{\text{PC}} = 35$  Hz,  $J_{\text{PC}} = 33$  Hz).  $^{31}\text{P}\{^1\text{H}\}$  NMR ( $\text{CDCl}_3$ , 20 °C):  $\delta$  155.7 (s,  $J_{\text{PP}} = 3455$  Hz). IR (KBr): 2963, 1593, 1477, 756  $\text{cm}^{-1}$ . FABMS:  $m/z$  1126 ( $\text{M}^+$ , 100) 945 (60). Anal. Calcd. for  $\text{C}_{66}\text{H}_{76}\text{P}_2\text{Pt}$ : C, 70.38; H, 6.80. Found: C, 70.13; H, 6.83.

**[Pt(tolan-OMe)(DPCB-phen)] (1c):** mp > 290 °C.  $^1\text{H}$  NMR ( $\text{CDCl}_3$ , 20 °C):  $\delta$  1.55 (s, 18H), 1.67 (s, 36H), 3.80 (s, 6H), 6.03 (d,  $J_{\text{HH}} = 8.0$  Hz, 2H), 6.75 (d,  $J_{\text{HH}} = 8.6$  Hz, 4H), 7.12 (t,  $J_{\text{HH}} = 7.6$  Hz, 2H),

7.46 (t,  $J_{\text{HH}} = 7.3$  Hz, 2H), 7.68 (s, 4H), 7.75 (d,  $J_{\text{HH}} = 8.6$  Hz, 4H), 8.43 (d,  $J_{\text{HH}} = 8.2$  Hz, 2H).  $^{13}\text{C}\{^1\text{H}\}$  NMR ( $\text{CDCl}_3$ , 20 °C):  $\delta$  31.6 (s), 33.8 (s), 35.4 (s), 38.9 (s), 55.3 (s), 113.3 (s), 121.5 (t,  $J_{\text{PC}} = 38$  Hz,  $\text{C}\equiv\text{C}$ ), 122.3 (s), 122.5 (t,  $J_{\text{PC}} = 11$  Hz), 123.7 (s), 124.9 (s), 125.1 (s), 127.0 (s), 127.4 (s), 131.6 (s), 131.8 (s), 133.2 (t,  $J_{\text{PC}} = 56$  Hz,  $J_{\text{PC}} = 4$  Hz), 143.0 (t,  $J_{\text{PC}} = 6$  Hz), 152.2 (s), 156.9 (s), 158.5 (s), 172.8 (t,  $J_{\text{PC}} = 35$  Hz).  $^{31}\text{P}\{^1\text{H}\}$  NMR ( $\text{CDCl}_3$ , 20 °C):  $\delta$  156.6 (s,  $J_{\text{PtP}} = 3436$  Hz). IR (KBr): 2962, 1600, 1507, 1243, 1036, 830, 757  $\text{cm}^{-1}$ . FABMS:  $m/z$  1186 ( $\text{M}^+$ , 100), 945 (23). Anal. Calcd. for  $\text{C}_{68}\text{H}_{80}\text{O}_2\text{P}_2\text{Pt}$ : C, 68.84; H, 6.80. Found: C, 68.97; H, 6.97.

**[Pt(tolan-NMe<sub>2</sub>)(DPCB-phen)] (1d)**: mp > 290 °C.  $^1\text{H}$  NMR ( $\text{CDCl}_3$ , 20 °C):  $\delta$  1.54 (s, 18H), 1.67 (s, 36H), 2.91 (s, 12H), 6.05 (d,  $J_{\text{HH}} = 7.9$  Hz, 2H), 6.56 (d,  $J_{\text{HH}} = 8.7$  Hz, 4H), 7.12 (t,  $J_{\text{HH}} = 7.5$  Hz, 2H), 7.44 (t,  $J_{\text{HH}} = 7.5$  Hz, 2H), 7.68 (s, 4H), 7.69 (d,  $J_{\text{HH}} = 8.7$  Hz, 4H), 8.42 (d,  $J_{\text{HH}} = 8.3$  Hz, 2H).  $^{13}\text{C}\{^1\text{H}\}$  NMR ( $\text{CDCl}_3$ , 20 °C):  $\delta$  31.7 (s), 33.9 (s), 35.6 (s), 39.0 (s), 40.6 (s), 111.9 (s), 119.5 (t,  $J_{\text{PC}} = 11$  Hz), 121.4 (t,  $J_{\text{PC}} = 37$  Hz,  $\text{C}\equiv\text{C}$ ), 122.2 (s), 123.6 (s), 125.0 (s), 125.1 (s), 126.7 (s), 127.3 (s), 132.3 (s), 132.2 (s), 133.2 (t,  $J_{\text{PC}} = 58$  Hz,  $J_{\text{PC}} = 4$  Hz), 142.9 (t,  $J_{\text{PC}} = 7$  Hz), 149.2 (s), 151.9 (s), 156.9 (s), 172.2 (t,  $J_{\text{PC}} = 34$  Hz).  $^{31}\text{P}\{^1\text{H}\}$  NMR ( $\text{CDCl}_3$ , 20 °C):  $\delta$  157.4 (s,  $J_{\text{PtP}} = 3406$  Hz). IR (KBr): 2961, 1602, 1516, 1362, 1124, 816, 755  $\text{cm}^{-1}$ . FABMS:  $m/z$  1212 ( $\text{M}^+$ , 100), 945 (23). Anal. Calcd. for  $\text{C}_{70}\text{H}_{86}\text{N}_2\text{P}_2\text{Pt}$ : C, 69.34; H, 7.15; N, 2.31. Found: C, 69.42; H, 7.05; N, 2.27.

**X-ray Crystal Structure Determination of 1c.** A single crystal of dimensions  $0.21 \times 0.17 \times 0.10$  was grown by slow diffusion of a  $\text{CH}_2\text{Cl}_2$  solution to MeOH at room temperature. The intensity data were collected on a Rigaku Mercury CCD diffractometer at 173 K using Mo  $K_\alpha$  radiation ( $\lambda = 0.71070$  Å). The data was corrected for Lorentz and polarization effects and absorption (REQAB). The structure was solved by direct methods (SHELXS-97) and refined on  $F^2$  against all reflections (SHELXL-97).<sup>2</sup> Further information has been deposited with the Cambridge Crystallographic Data Centre (CCDC-661220). Crystallographic data are summarized in Table S1.

## References

- (1) Nakamura, A.; Kawasaki, S.; Toyota, K.; Yoshifuji, M. *Chem. Lett.* **2004**, 33, 1570.
- (2) Sheldrick, G. M. *SHELXL-97*; University of Gottingen: Germany, 1997.

**Table S1. Crystallographic Data for 1c**

|                                                     |                                                                  |
|-----------------------------------------------------|------------------------------------------------------------------|
| color                                               | purple                                                           |
| habit                                               | block                                                            |
| crystal size (mm)                                   | 0.21 × 0.17 × 0.10                                               |
| formula                                             | C <sub>68</sub> H <sub>80</sub> O <sub>2</sub> P <sub>2</sub> Pt |
| formula weight                                      | 1186.35                                                          |
| crystal system                                      | monoclinic                                                       |
| <i>a</i> (Å)                                        | 14.684(3)                                                        |
| <i>b</i> (Å)                                        | 22.008(4)                                                        |
| <i>c</i> (Å)                                        | 18.693(3)                                                        |
| $\beta$ (deg)                                       | 107.720(2)                                                       |
| <i>V</i> (Å <sup>3</sup> )                          | 5754.3(18)                                                       |
| space group                                         | <i>P</i> 2 <sub>1</sub> / <i>c</i> (No. 14)                      |
| <i>Z</i>                                            | 4                                                                |
| <i>d</i> <sub>calcd</sub> (g cm <sup>-3</sup> )     | 1.369                                                            |
| $\mu$ (Mo <i>K</i> α) (mm <sup>-1</sup> )           | 2.538                                                            |
| transmission factor                                 | 0.6177–0.7854                                                    |
| $\theta$ range (deg)                                | 3.00–27.48                                                       |
| no. of reflns collected                             | 45340                                                            |
| no. of independent reflns                           | 13140 [ <i>R</i> <sub>int</sub> = 0.0347]                        |
| no. of reflns with <i>I</i> > 2σ( <i>I</i> )        | 11936                                                            |
| no. of variables                                    | 898                                                              |
| goodness-of-fit on <i>F</i> <sup>2</sup>            | 1.085                                                            |
| final <i>R</i> indices [ <i>I</i> > 2σ( <i>I</i> )] | <i>R</i> <sub>1</sub> = 0.0266, <i>wR</i> <sub>2</sub> = 0.0586  |
| <i>R</i> indices (all data)                         | <i>R</i> <sub>1</sub> = 0.0319, <i>wR</i> <sub>2</sub> = 0.0610  |
